# Supplementary material for: An unprecedented ambipolar charge transport material exhibiting balanced electron and hole mobilities
Source: Royal Society of Chemistry journal article supplement (doi:10.1039/b617821a), 2007-01-01
Supplement: b617821a.pdf [file b617821a.pdf]

# An Unprecedented Ambipolar Charge Transport Material Exhibiting Balanced Electron and Hole Mobilities

Yuan-Li, Liao<sup>a</sup>, Chi-Yen Lin<sup>a</sup>, Yi-Hung Liu<sup>a</sup>, Ken-Tsung Wong<sup>a\*</sup>, Wen-Yi Hung<sup>b\*</sup> and Wei-Jiun Chen<sup>b</sup>

<sup>a</sup> Department of Chemistry, National Taiwan University, Taipei, Taiwan 106. Fax: 886 2 33661667;

Tel: 886 2 33661665; E-mail: kenwong@ntu.edu.tw

<sup>b</sup> Institute of Optoelectronic Sciences, National Taiwan Ocean University, Keelung, Taiwan 202.

E-mail: wenhung@mail.ntou.edu.tw

## Electronic Supplementary Information

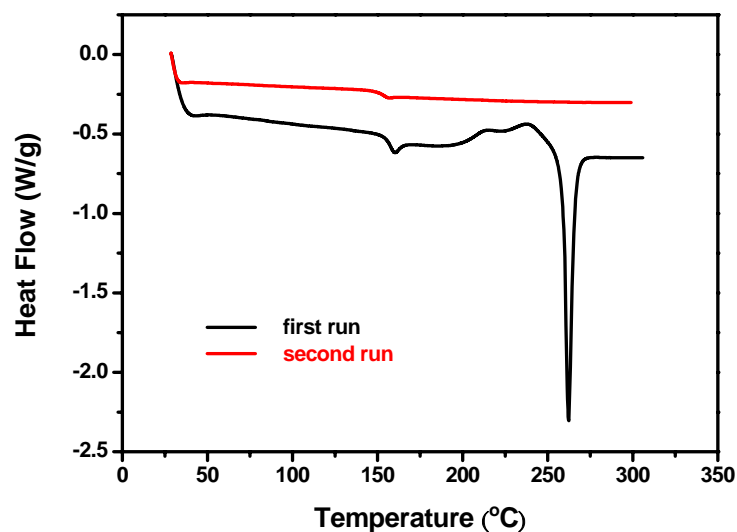

**Fig. S-1:** Differential scanning calorimetry (DSC) analyses of **27BPSF**. For the first run with heating rate of 20 °C/min., a glassy transition temperature ( $T_g$ ) was found at around 160 °C and a distinct melting point ( $T_m$ ) was detected at 262 °C. The isotropic sample then was quenched with liquid nitrogen to be a glassy solid which was heated in the second run with heating rate of 10 °C/min., the glassy transition temperature thus can be determined to be 150 °C, no further phase transition was detected after the  $T_g$  point.

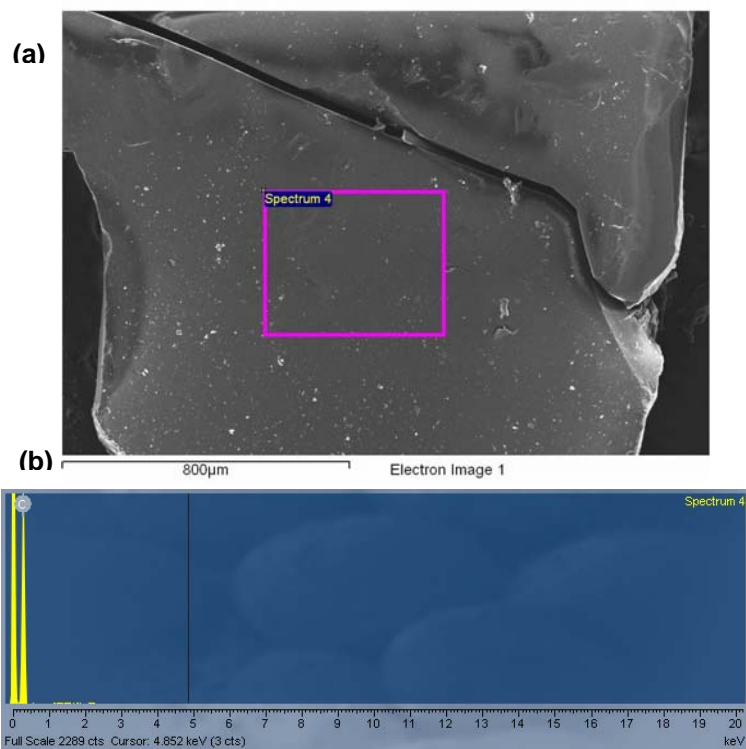

**Fig. S-2:** (a) The scanning electron microscope (SEM) image of a sublimed sample of **27BPSF**. (b) The energy dispersive X-ray (EDX) analysis spectrum of **27BPSF** detected within a specific area designated in a purple square in (a). The EDX spectrum clearly indicates that only carbon atom was detected, and no trace of Pd was found in the sample.

**GDM analyses based on the field and temperature dependence of electron and hole mobilities.**

The zero-field mobility  $\mu(0,T) = \mu_0 \exp[-(2\sigma/3k_B T)^2]$  in equation 1 is obtained by extrapolation to zero field ( $E = 0$ ) from results of Fig. 3. The semi-logarithmic plots of the zero-field mobilities versus  $1/T^2$  for electrons and holes are shown in Figs. S-1(a). From the data, a linear relationship was observed with a transition at  $T_{ND}$  about 240 K for electrons and holes, which may be due to carriers not attaining dynamic equilibrium while migrating through the organic layer at low temperatures and thus becoming “dispersive”. For  $T > T_{ND}$ , the zero-field mobility values  $\mu_0$ , the energetic disorder width  $\sigma$ , and the degree of positional disorder  $\Sigma$  were determined. The prefactor mobilities (disorder-free mobilities)  $\mu_0$  for electrons and holes are about  $7.4 \times 10^{-3} \text{ cm}^2/\text{V}\cdot\text{s}$  and  $6.5 \times 10^{-3} \text{ cm}^2/\text{V}\cdot\text{s}$ , respectively. It indicates that intrinsic intermolecular charge-transfer characteristics of **27BPSF** are similar capable of transporting electrons and holes.  $\sigma$  for electron and hole are about 69 meV and 65 meV, respectively. Inally, the slope  $\beta(T) = C[(\sigma/k_B T)^2 - \Sigma^2]$  obtained from results of Fig. 3 was plotted versus  $(\sigma/k_B T)^2$  for electrons and holes shown in Fig. S-1(b), and the values of  $C$  and  $\Sigma$  were determined.  $\Sigma$  for electrons and holes are 1.4 and 1.6, respectively.  $C$  for electrons and holes are  $3.6 \times 10^{-4} \text{ V}^{1/2}/\text{cm}^{1/2}$  and  $4 \times 10^{-4} \text{ V}^{1/2}/\text{cm}^{1/2}$ , respectively.

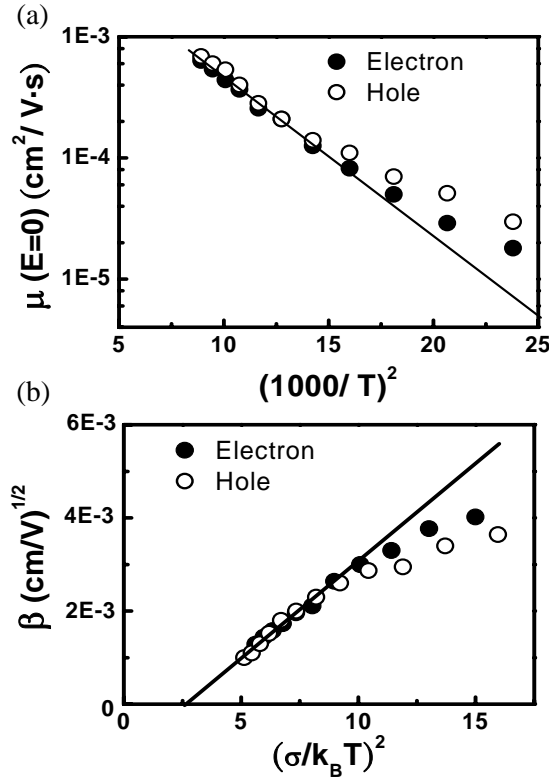

**Fig. S-3:** (a) Temperature dependence of mobilities at zero-field, (b)  $\beta$  vs.  $(\sigma/k_B T)^2$  for **27BPSF**.

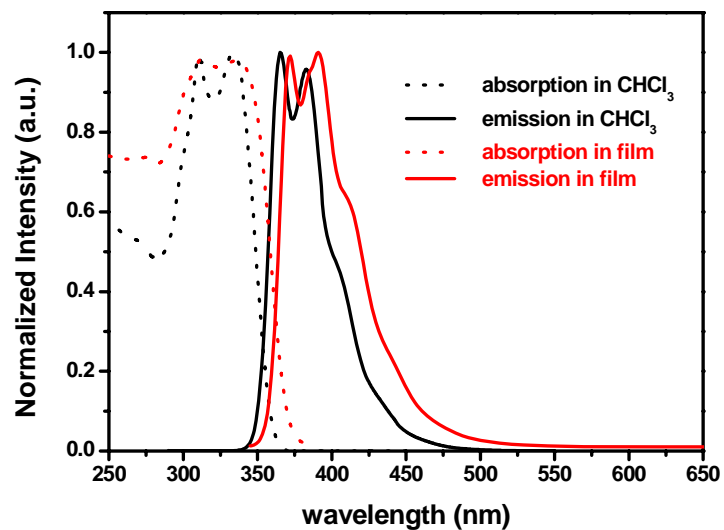

**Fig. S-4:** The electronic absorption and photoluminescence spectra of **27BPSF** in dilute  $\text{CHCl}_3$  solution and in solid thin films. Both absorption and emission spectra of **27BPSF** were found to be slightly red-shifted as compared to those detected in solution, which are usual phenomena encountered in solid samples due to the different dielectric environments. Since there is no distinct low-energy peak was found in the spectra, we assume that there is no significant intermolecular interactions occurred in the amorphous thin films.
